# Supplementary material for: A nanostructure platform for live-cell manipulation of membrane curvature
Source: Springer Nature journal article supplement (doi:10.1038/s41596-019-0161-7), 2019-05-17
Supplement: 41596_2019_161_MOESM1_ESM.pdf [file 41596_2019_161_MOESM1_ESM.pdf]

In the format provided by the authors and unedited.

# A nanostructure platform for live-cell manipulation of membrane curvature

Xiao Li<sup>1</sup>, Laura Matino<sup>2,3</sup>, Wei Zhang<sup>1</sup>, Lasse Klausen<sup>1</sup>, Allister F. McGuire<sup>1</sup>,  
Claudia Lubrano<sup>2</sup>, Wenting Zhao<sup>4\*</sup>, Francesca Santoro<sup>2\*</sup> and Bianxiao Cui<sup>1\*</sup>

---

<sup>1</sup>Department of Chemistry, Stanford University, Stanford, CA, USA. <sup>2</sup>Center for Advanced Biomaterials for Healthcare, Istituto Italiano di Tecnologia, Naples, Italy. <sup>3</sup>Department of Chemical Materials and Industrial Production Engineering, University of Naples Federico II, Naples, Italy. <sup>4</sup>School of Chemical and Biomedical Engineering, Nanyang Technological University, Singapore, Singapore. \*e-mail: [wzhao@ntu.edu.sg](mailto:wzhao@ntu.edu.sg); [francesca.santoro@iit.it](mailto:francesca.santoro@iit.it); [bcui@stanford.edu](mailto:bcui@stanford.edu)

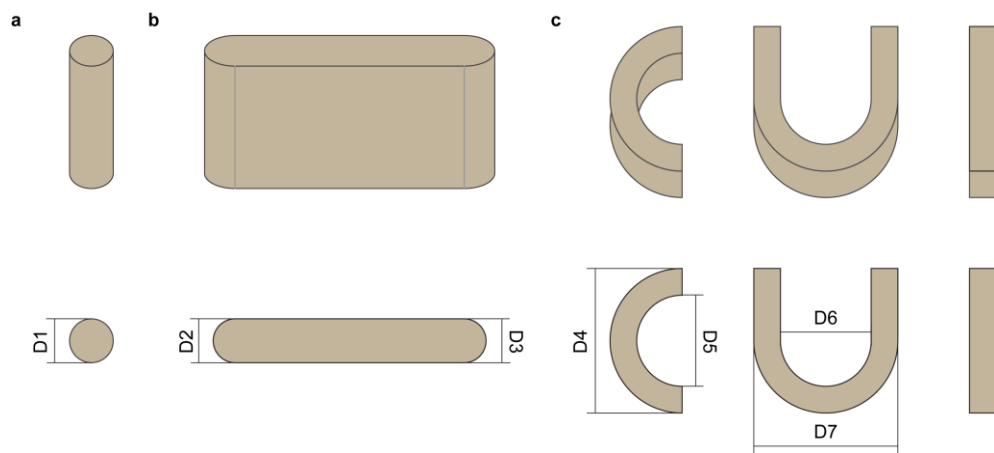

### Supplementary Figure 1

Curvature measurements on the nanostructures.

The measurements of the curvatures designed in the nanostructures are labeled in the top view. "D" denotes diameter. The values of the curvatures are listed in Supplementary Table 1. There are also flat surfaces as a control in the design, such as the side walls of the nanobar (b) and the I in CUI (c).

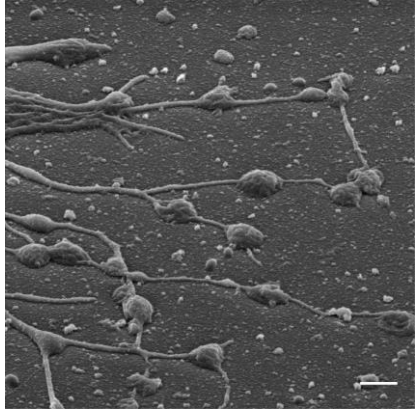

**Supplementary Figure 2**

Microbubbles in FIB-SEM.

Air trapped in resin deforms cellular structure. Scale, 1  $\mu\text{m}$ .

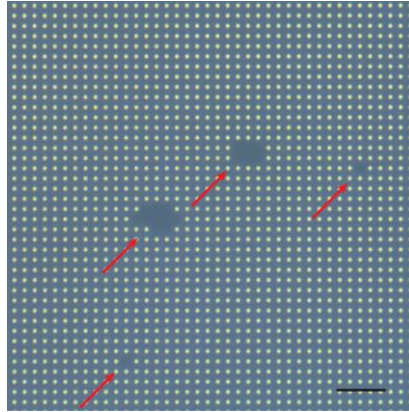

**Supplementary Figure 3**

Optical micrograph of defects after liftoff.

The regions of missing Cr masks are indicated by the red arrows. Scale bar, 5  $\mu\text{m}$ .

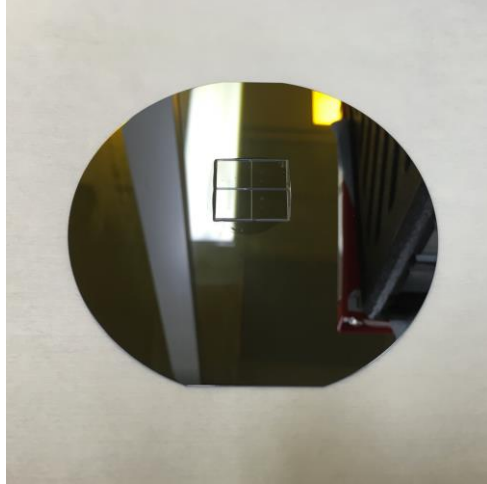

**Supplementary Figure 4**

Substrate piece placed on a carrier wafer for dry etching.

The substrate piece is cut into four pieces. Vacuum pump oil is applied between the substrate piece and dummy wafer.

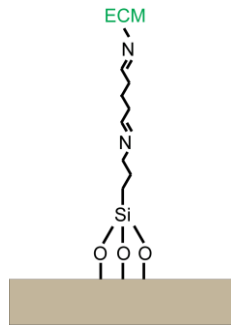

**Supplementary Figure 5**

Surface chemistry for immobilizing ECM proteins.

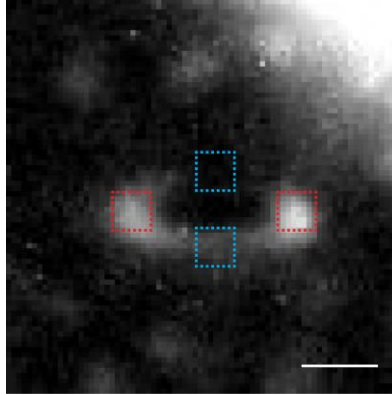

### Supplementary Figure 6

Selection of ends and centers on a nanobar.

This is a crop from U2-OS DNM2-EGFP fluorescence image (5  $\mu\text{m}$  by 5  $\mu\text{m}$ ), generated. The small blue masks select the centers on both sides of the nanobar. The small red masks select the ends of the nanobar. The intensity values are read in a customized MATLAB program. The total intensity of the ends is divided by the total intensity of the centers to obtain a ratio for a given nanobar. Scale bar, 1  $\mu\text{m}$ .

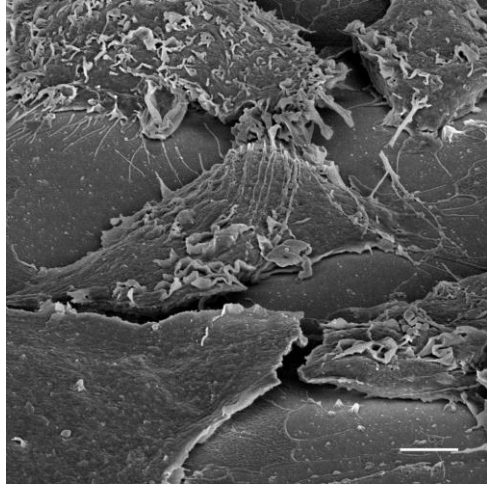

**Supplementary Figure 7**

Cracks in samples in FIB-SEM.

Scale bar, 5  $\mu\text{m}$ .



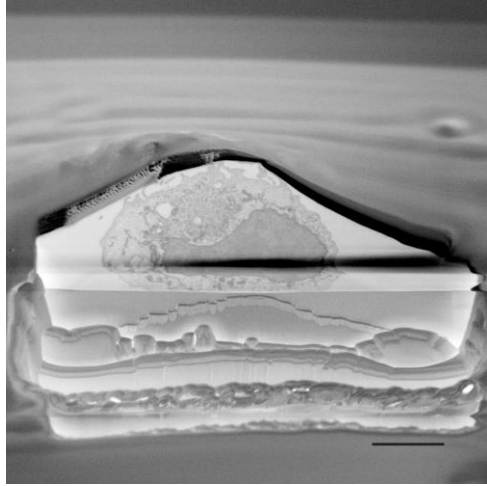

**Supplementary Figure 8**

Charging effect in FIB-SEM imaging.

Scale bar, 5  $\mu\text{m}$ .

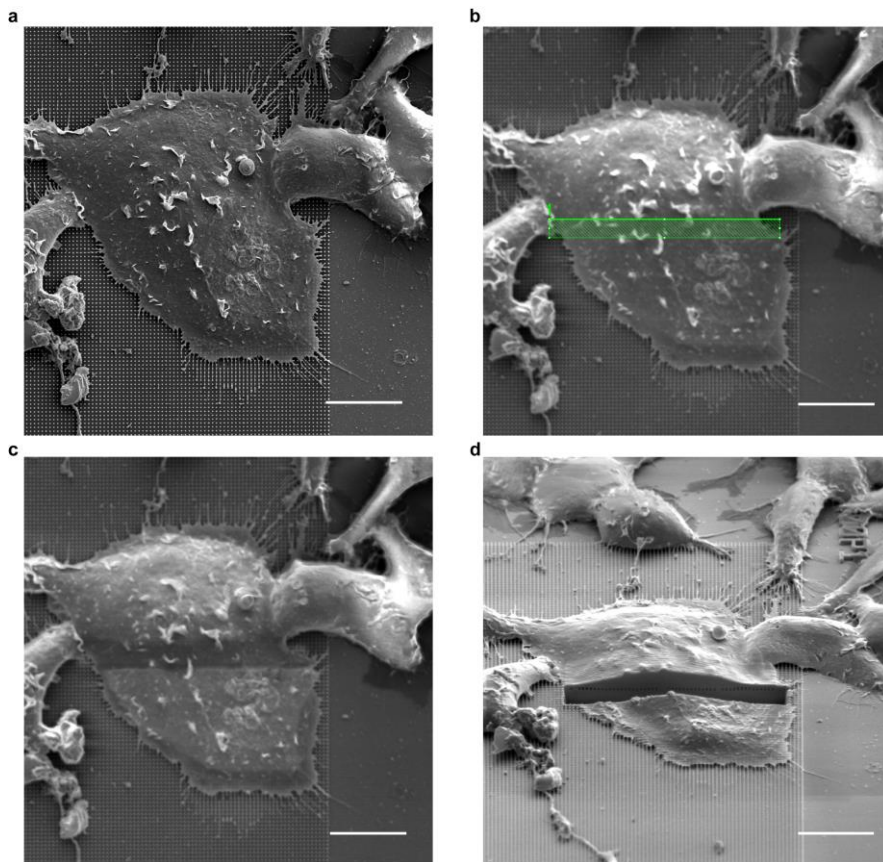

**Supplementary Figure 9**

Cross-sectioning in FIB-SEM.

**a**, Secondary electron imaging. **b**, Location of a region of interest. **c**, Pt deposition. **d**, Trenching. Scale bars, 1  $\mu\text{m}$ .

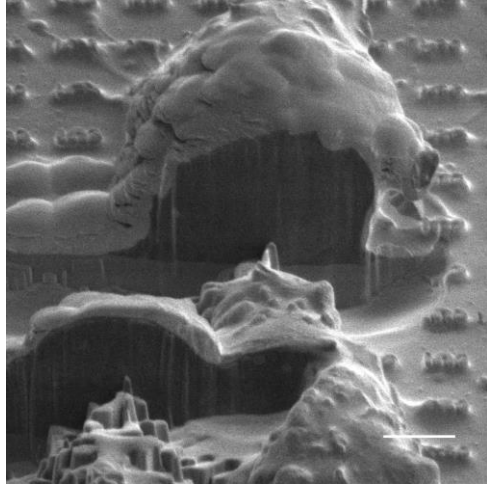

**Supplementary Figure 10**

Curtaining effect.

Sample is tilted to 52°.

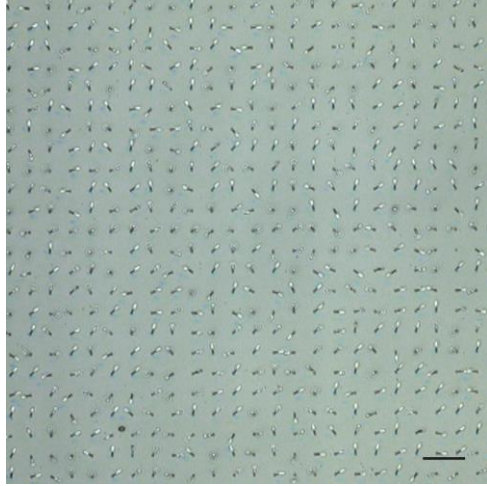

**Supplementary Figure 11**

Collapsed nanopillars after dry etching.

Nanopillars are 200 nm in diameter and 1  $\mu\text{m}$  in height. Scale bar, 5  $\mu\text{m}$ .

| Curvature label | Curvature value in the design                                           | Curvature orientation |
|-----------------|-------------------------------------------------------------------------|-----------------------|
| D1              | 200, 500 and 1000 nm                                                    | Positive              |
| D2              | 100, 200, 300, 400, 500, 600, 700, 800,<br>and 1000 nm                  | Positive              |
| D3              | 100, 200, 300, 400, 500, 600, 700, 800,<br>and 1000 nm (the same as D2) | Positive              |
| D4              | 1000 nm                                                                 | Positive              |
| D5              | 600 nm                                                                  | Negative              |
| D6              | 600 nm                                                                  | Negative              |
| D7              | 1000 nm                                                                 | Positive              |

**Supplementary Table 1**

Curvature values in the design.

The curvatures are labeled in Supplementary Fig. 1.
